# Supplementary material
Source: Royal Society of Chemistry journal article supplement (doi:10.1039/d6cy00428h)
Supplement: d6cy00428h1.pdf [file d6cy00428h1.pdf]

## Electronic Supplementary information for

### Dual Pd<sup>2+</sup> and Pd<sup>0</sup> Sites on CeO<sub>2</sub> for Selective Oxidative C-C Bond Breaking of β-O-4 Linkage in Lignin

Yuzhen Hu<sup>ac</sup>, Ruiying Xiong<sup>a</sup>, Xin Qu<sup>b</sup>, Taras Nagorny<sup>c</sup>, Zhenlong Song<sup>d</sup>, Xingye

Zeng<sup>a</sup>, Ning Li<sup>a</sup>, Qi Zhang<sup>\*b</sup>, Longlong Ma<sup>b</sup>

<sup>a</sup> Department of Chemistry, Guangdong University of Petrochemical Technology, Maoming, 525011, China

<sup>b</sup> Key Laboratory of Energy Thermal Conversion and Control of Ministry of Education, School of Energy and Environment, Southeast University, Nanjing 210096, China

<sup>c</sup> Chemical Engineering Department, University of Massachusetts Amherst 01002, MA, USA

<sup>d</sup> Department of Engineering Science, University of Science and Technology of China, Hefei 230026, China

\* Corresponding author: zhangqiseu@seu.edu.cn

|                |             |
|----------------|-------------|
| No. of Pages   | 10 (S1-S10) |
| No. of Figures | 7 (S1-S7)   |
| No. of Tables  | 2 (S1-S2)   |

## 1. Characterization and Equipment

Transmission electron microscope (TEM) and high-resolution transmission electron microscope (HR-TEM) were used to examine the morphology of the catalysts on JEM-2100F electron microscope. X-ray diffraction (XRD) analysis was conducted using a Philips X'Pert Pro diffractometer (PW3040/60) with Cu K $\alpha$  radiation ( $\lambda = 1.542$  Å) at 40 kV and 40 mA. The diffraction patterns were recorded at a scanning rate of 2°/min over a range of 5° to 80°. Elemental analysis was performed using an Atom Scan 16 inductively coupled plasma atomic emission spectrometer (ICP-AES). The samples were dissolved in a known amount of aqua regia before measurement to ensure that the concentrations of the measured elements were comparable to those of the prepared standard solutions. X-ray photoelectron spectra (XPS) was used to analyze the surface chemical states of Pd, Ce and O with a Thermo Fisher XPS spectrometer (Escalab250Xi) using Al K $\alpha$  radiation. The C1s peak at 284.6 eV was used as a reference for calibrating the binding energy. Raman spectra were obtained by exciting the sample at 532 nm with a Raman microscope system (LabRAM HR800, HORIBA Jobin Yvon) within the spectral range of 200 to 1000 cm<sup>-1</sup> and a spectral resolution of 2 cm<sup>-1</sup>. Gas chromatography-flame ionization detector (GC-FID, GC-2010 Pro A) was used to determine the conversion and product yields. 1  $\mu$ L injection volume was used with a 30 m  $\times$  250  $\mu$ m  $\times$  0.25  $\mu$ m column (Rtx-SH-5), with a split ratio of 30:1. The GC conditions included an inlet temperature of 280 °C and an oven temperature program starting at 80 °C, ramping at 10 °C min<sup>-1</sup> to 280 °C, resulting in a total run time of 32 minutes.

## 2. Figures and Tables

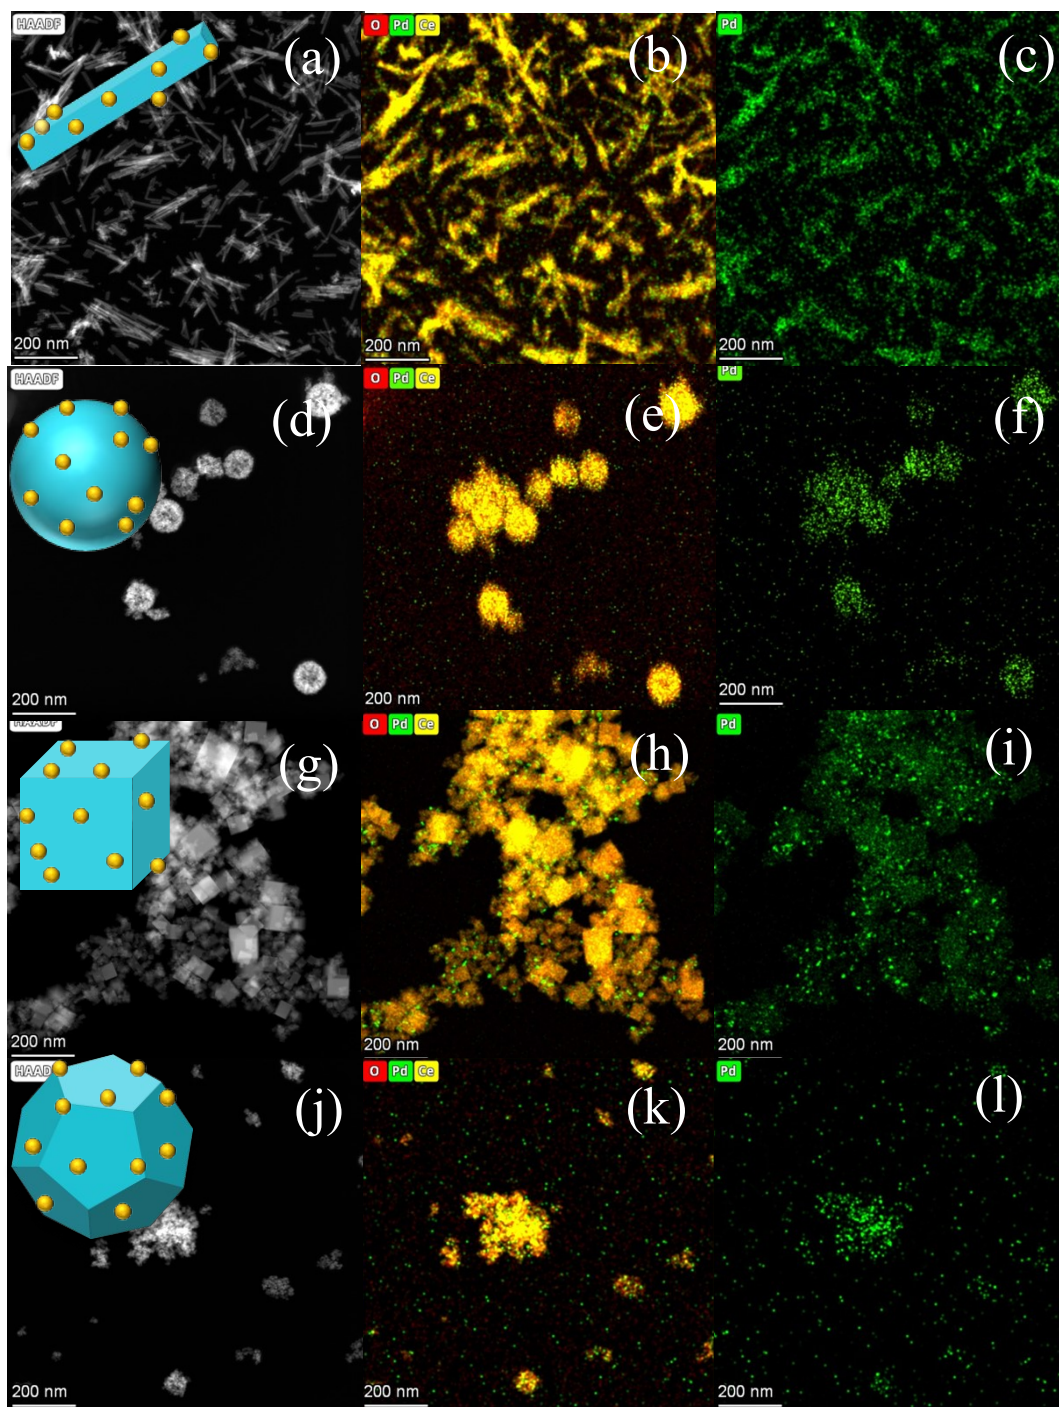

**Fig. S1** HAADF-STEM images and corresponding EDS elemental mappings of all the Pd/CeO<sub>2</sub> catalysts with different morphologies: (a)-(c) Pd/CeO<sub>2</sub>-R; (d)-(f) Pd/CeO<sub>2</sub>-S; (g)-(i) Pd/CeO<sub>2</sub>-C; (j)-(l) Pd/CeO<sub>2</sub>-P, respectively. Ce, O, and Pd elements are presented in yellow, red and green, respectively.

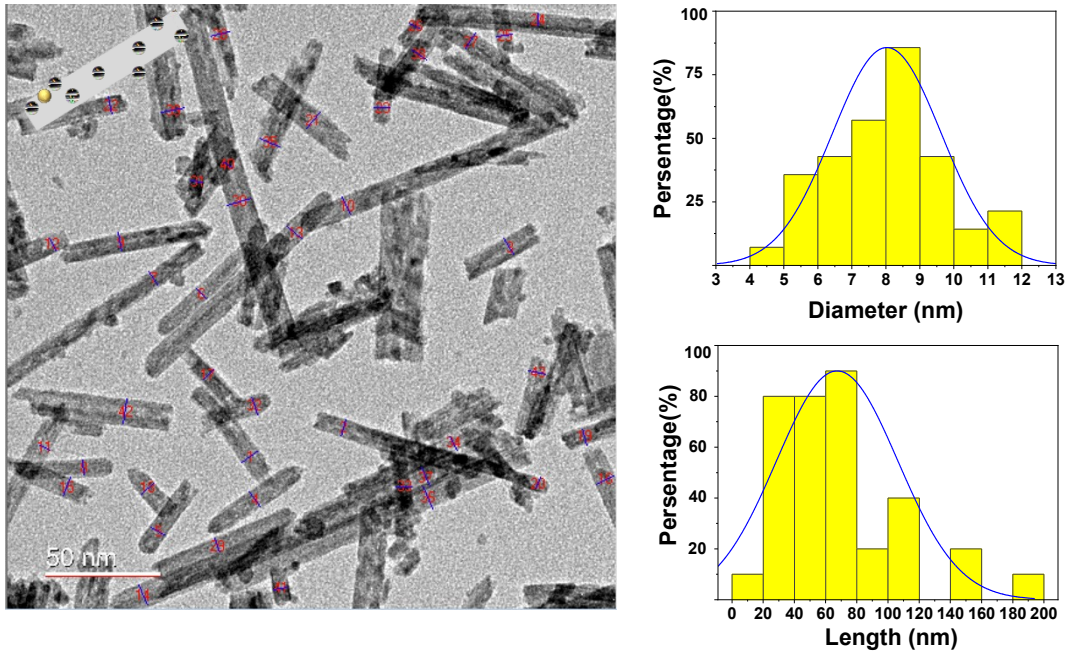

**Fig. S2** TEM and particle size distribution of Pd/CeO<sub>2</sub> catalysts with rod morphology, with an average length of 67.4 nm and an average diameter of 8.0 nm (43 particles counted).

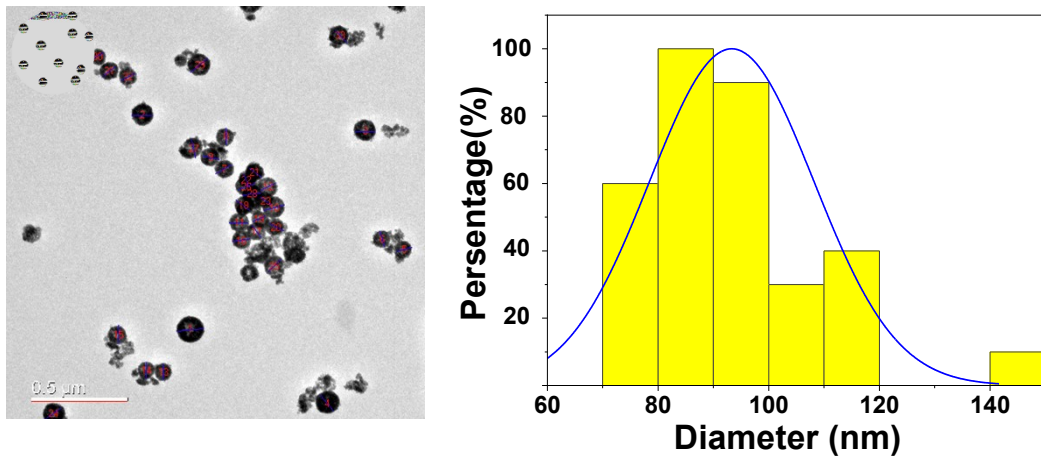

**Fig. S3** TEM and particle size distribution of Pd/CeO<sub>2</sub> catalysts with sphere morphology, with an average diameter of 93.3 nm (33 particles counted)

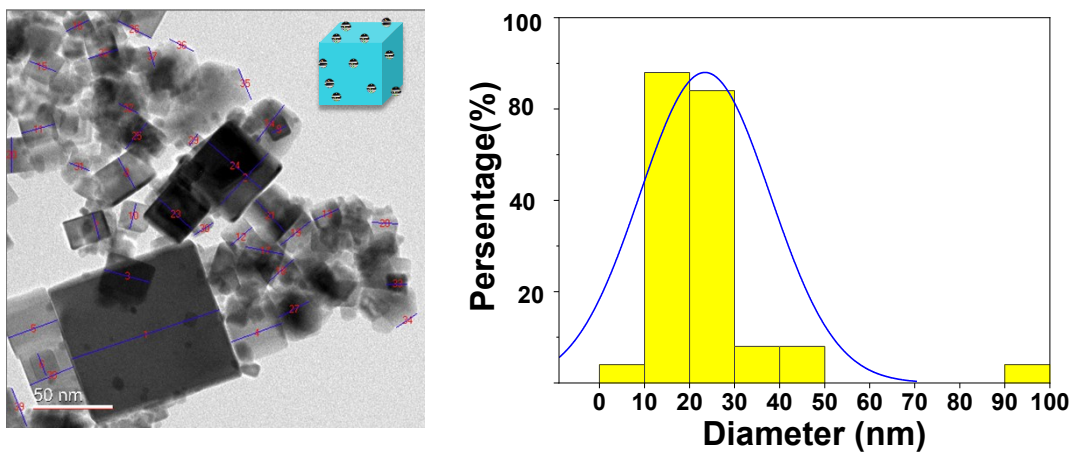

**Fig. S4 TEM and particle size distribution of Pd/CeO<sub>2</sub> catalysts with cubic morphology, with an average diameter of 23.4 nm (39 particles counted)**

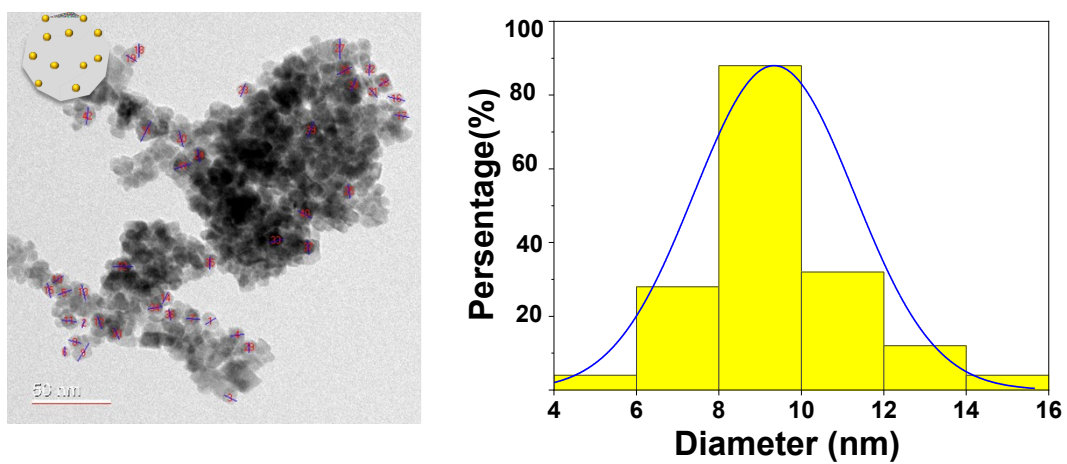

**Fig. S5 TEM and particle size distribution of Pd/CeO<sub>2</sub> catalysts with polyhedron morphology, with an average diameter of 9.3 nm (42 particles counted).**

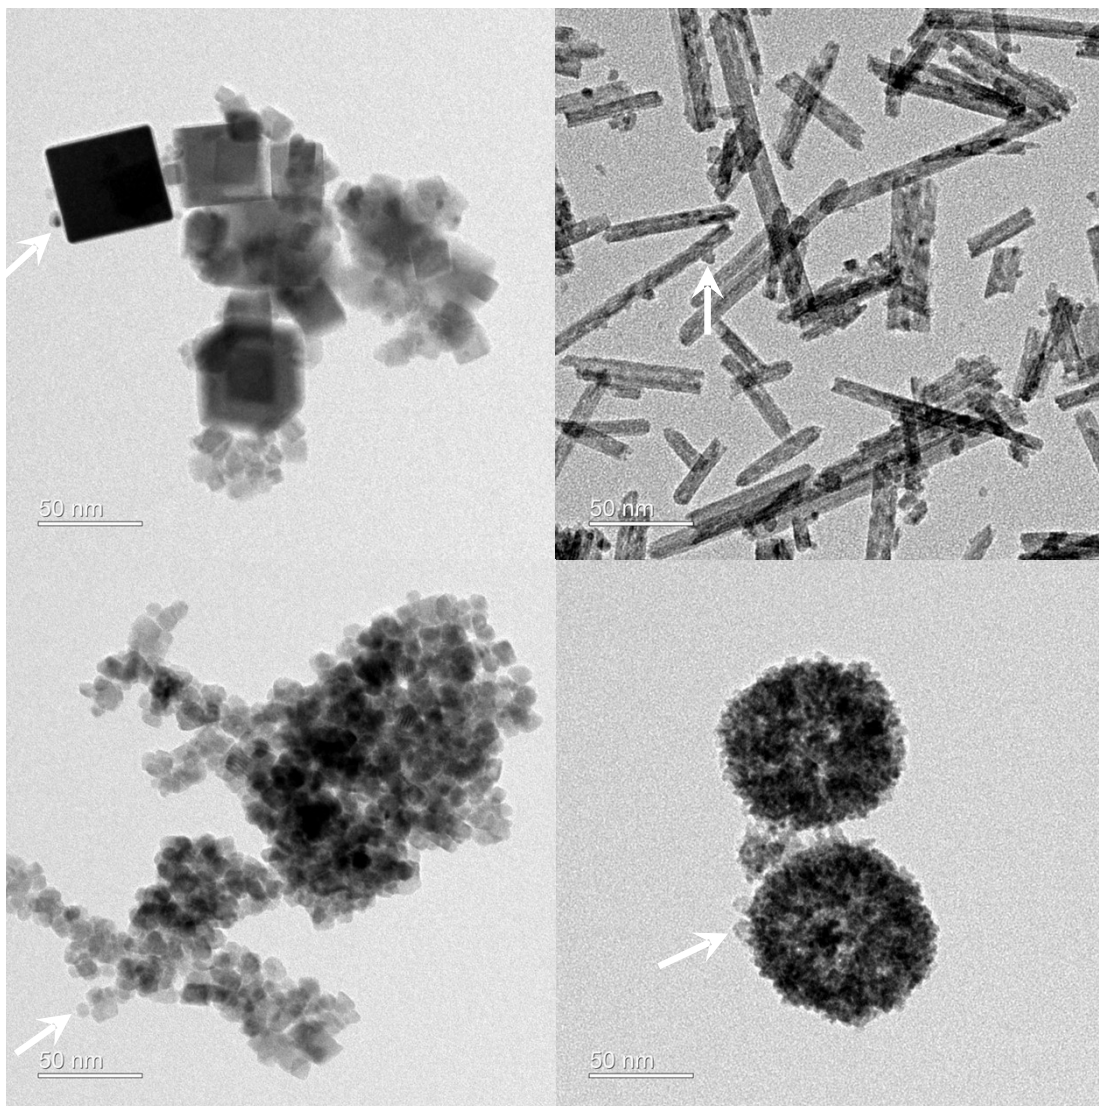

**Figure S6** TEM of Pd/CeO<sub>2</sub> catalysts with different morphologies (palladium nanoparticles were highlighted with white arrows).

(a) 1:1 reactant to catalyst ratio

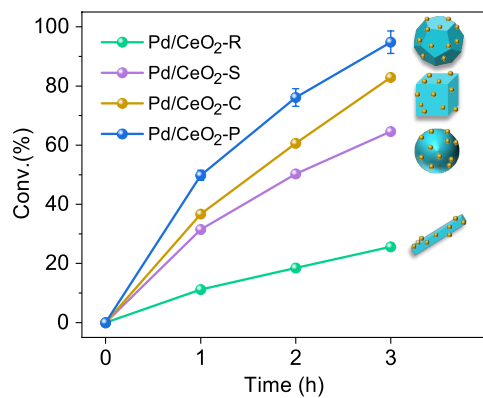

(b) 1:0.5 reactant to catalyst ratio

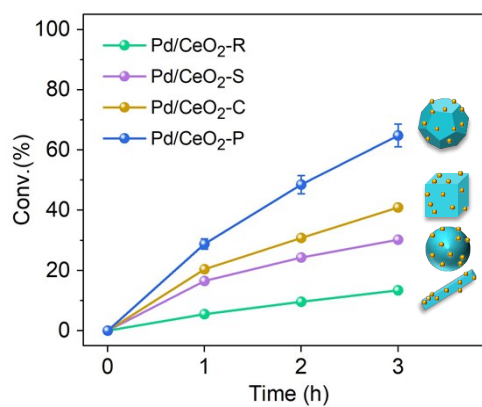

**Fig.S7** Time-dependent conversion of 2-Phenoxy-1-Phenylethanone over Pd/CeO<sub>2</sub> catalysts with different morphologies at a (a) 1: 1 reactant-to-catalyst ratio and (b) 1: 0.5 reactant-to-catalyst ratio.

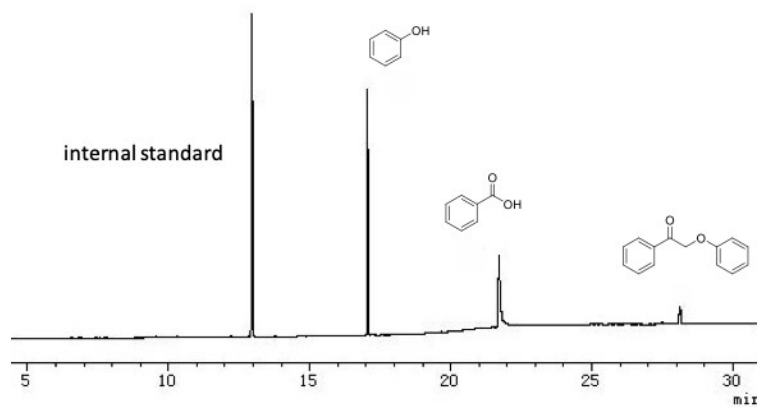

**Fig. S8** Gas chromatogram of the conversion of 2-phenoxy-1-phenylethanone over the Pd/CeO<sub>2</sub>-P catalyst at 50 °C for 3h. The internal standard (IS) is acetophenone.

**Table S1** Selective Oxidative Cleavage of C-C Bonds in Lignin  $\beta$ -O-4 Ketones using Different Catalysts

| Entry | Catalyst                                                    | Conditions       | Conv. | Yields<br>(Benzoic acid,<br>Phenol) | Catalyst consumption<br>( $\text{kg}_{\text{cat}}$ per<br>$\text{kg}_{\text{prod}}$ ) | Conversion Rate( $\text{min}^{-1}$ ) | Ref.       |
|-------|-------------------------------------------------------------|------------------|-------|-------------------------------------|---------------------------------------------------------------------------------------|--------------------------------------|------------|
| 1     | [PMim][NTf <sub>2</sub> ]<br>/[PrSO <sub>3</sub> HMim][OTf] | RT, 2h,<br>UV    | 87.1% | 78.3%<br>55.5%                      | 71.77                                                                                 | -                                    | [1]        |
| 2     | Formic acid/F <sub>3</sub> CSO <sub>3</sub> H               | 25 °C-4 h        | 99.5% | 96.3%<br>28.9%                      | 33.94                                                                                 | -                                    | [2]        |
| 3     | m-CPBA/NaHCO <sub>3</sub>                                   | ~ 25 °C-<br>15 h | 100%  | 99%<br>-                            | 4.25                                                                                  | -                                    | [3]        |
| 4     | Cu(OAc) <sub>2</sub> /BF <sub>3</sub> ·OEt <sub>2</sub>     | 100 °C-3<br>h    | 99%   | 96%<br>95%                          | 1.87                                                                                  | -                                    | [4]        |
| 5     | 2M NaOH                                                     | 50 °C-10<br>h    | 100%  | 88%<br>42%                          | 1.36                                                                                  | -                                    | [5]        |
| 6     | (dipic)VV(O)(OiPr)                                          | 100 °C-48<br>h   | ~40%  | 19%<br>-                            | 1.26                                                                                  | -                                    | [6]        |
| 7     | CuCl                                                        | 30°C-5.5<br>h    | 97%   | 85%<br>89%                          | 0.72                                                                                  | -                                    | [7]        |
| 8     | HTc-Cu-V                                                    | 135 °C-24<br>h   | >95%  | 80%<br><2%                          | 0.46                                                                                  | 0.002                                | [8]        |
| 9     | Cu(NO <sub>3</sub> ) <sub>2</sub> ·3H <sub>2</sub> O        | 120 °C-10<br>h   | -     | >99%<br>43%                         | 0.31                                                                                  | 0.015                                | [9]        |
| 10    | CeO <sub>2</sub>                                            | 170 °C-2<br>h    | 76%   | 56%<br>58%                          | 1.36                                                                                  | -                                    | [10]       |
| 11    | 15Ce-5Cu/MFI-ns                                             | 100 °C-4<br>h    | 99.9% | 98.0%<br>85.3%                      | 0.25 <sup>a</sup>                                                                     | 0.040                                | [11]       |
| 12    | CTF-pDCB-1                                                  | 160 °C-6<br>h    | >99%  | 24.0%<br>45.1%                      | 0.20 <sup>a</sup>                                                                     | -                                    | [12]       |
| 13    | Pd/CeO <sub>2</sub>                                         | 50 °C -3h        | 94.8% | 85.5%<br>88.1%                      | 0.13 <sup>a</sup>                                                                     | 0.346                                | This study |

<sup>a</sup> Catalyst consumption was determined based on the number of cycles without deactivation reported in the literature, which means that this value can be lower.

**Table S2** Catalytic conversion of 2-phenoxy-1-phenylethanone.

| Entry          | Catalyst                 | Conversion (%) | Yields (mol%) |        |
|----------------|--------------------------|----------------|---------------|--------|
|                |                          |                | benzoic acid  | phenol |
| 1              | -                        | 8.2            | 0.9           | 2.2    |
| 2              | CeO <sub>2</sub> -P      | 10.5           | 1.1           | 2.5    |
| 3              | Pd/CeO <sub>2</sub> -P   | 94.8           | 85.5          | 89.4   |
| 4 <sup>a</sup> | Pd + CeO <sub>2</sub> -P | 25.3           | 7.5           | 10.6   |

General conditions: 2-phenoxy-1-phenylethanone (0.1 mmol), catalyst (20 mg), H<sub>2</sub>O<sub>2</sub>(30%,0.5mL), NaOH (0.4 mmol), water solvent (2.5 mL), 50 °C, 3h. <sup>a</sup> Physically mixed Pd and CeO<sub>2</sub>-P (no formal synthesis). The pure Pd powder was synthesized using the same formaldehyde reduction procedure but without the addition of any CeO<sub>2</sub> support.

## References

- [1] Y. Kang, X.M. Lu, G.J. Zhang, X.Q. Yao, J.Y. Xin, S.Q. Yang, Y.Q. Yang, J.L. Xu, M. Feng, S.J. Zhang, Metal-Free Photochemical Degradation of Lignin-Derived Aryl Ethers and Lignin by Autologous Radicals through Ionic Liquid Induction, *Chemsuschem*, 12 (2019) 4005-4013.
- [2] X. Li, Y. Zhang, Metal Catalyst-Free Oxidative C–C Bond Cleavage of a Lignin Model Compound by H<sub>2</sub>O<sub>2</sub> in Formic Acid, *ChemSusChem*, 13 (2020) 1740-1745.
- [3] Y. Wang, Q. Wang, J. He, Y. Zhang, Highly effective C–C bond cleavage of lignin model compounds, *Green Chemistry*, 19 (2017) 3135-3141.
- [4] M. Wang, L. Li, J. Lu, H. Li, X. Zhang, H. Liu, N. Luo, F. Wang, Acid promoted C–C bond oxidative cleavage of β-O-4 and β-1 lignin models to esters over a copper catalyst, *Green Chemistry*, 19 (2017) 702-706.
- [5] A. Rahimi, A. Azarpira, H. Kim, J. Ralph, S.S. Stahl, Chemoselective metal-free aerobic alcohol oxidation in lignin, *Journal of the American Chemical Society*, 135 (2013) 6415-6418.
- [6] B. Sedai, C. Diaz-Urrutia, R.T. Baker, R. Wu, L.P. Silks, S.K. Hanson, Comparison of copper and vanadium homogeneous catalysts for aerobic oxidation of lignin models, *ACS Catalysis*, 1 (2011) 794-804.
- [7] Y.Z. Hu, L. Yan, X.L. Zhao, C.U. Wang, S. Li, X.H. Zhang, L.L. Ma, Q. Zhang, Mild selective oxidative cleavage of lignin C-C bonds over a copper catalyst in water, *Green Chemistry*, 23 (2021) 7030-7040.
- [8] T. Rinesch, J. Mottweiler, M. Puche, P. Concepcion, A. Corma, C. Bolm, Mechanistic investigation of the catalyzed cleavage for the lignin β-O-4 linkage: implications for vanillin and vanillic acid formation, *ACS Sustainable Chemistry Engineering*, 5 (2017) 9818-9825.
- [9] H.F. Liu, M. Wang, H.J. Li, N.C. Luo, S.T. Xu, F. Wang, New protocol of copper-catalyzed oxidative C(CO)-C bond cleavage of aryl and aliphatic ketones to organic acids using O-2 as the terminal oxidant, *J Catal*, 346 (2017) 170-179.
- [10] W. Deng, H. Zhang, X. Wu, R. Li, Q. Zhang, Y. Wang, Oxidative conversion of lignin and lignin model compounds catalyzed by CeO<sub>2</sub>-supported Pd nanoparticles, *Green chemistry*, 17 (2015) 5009-5018.
- [11] L.X. Li, J.H. Kong, H.M. Zhang, S.J. Liu, Q. Zeng, Y.Q. Zhang, H. Ma, H.Y. He, J.X. Long, X.H. Li, Selective aerobic oxidative cleavage of lignin C-C bonds over novel hierarchical Ce-Cu/MFI nanosheets, *Appl Catal B-Environ*, 279 (2020).
- [12] L. Zhao, S. Shi, M. Liu, G. Zhu, M. Wang, W. Du, J. Gao, J. Xu, Covalent triazine framework catalytic oxidative cleavage of lignin models and organosolv lignin, *Green Chemistry*, 20 (2018) 1270-1279.
